# Supplementary material for: Nature and function of insulator protein binding sites in the Drosophila genome
Source: HighWire-hosted journal article supplement (doi:10.1101/gr.138156.112), 2012-07-05
Supplement: Schwartz_Supplementary_text_final_revision.docx [file Schwartz_Supplementary_text_final_revision.docx]

**Supplementary material**

This supplementary material contains the following items.

1. Supplementary methods

2. Supplementary results

3. Supplementary references

4. Supplementary figure legends

**Supplementary methods**

**Cell culture conditions and RNAi**

Cell lines were obtained from the Drosophila Genome Resource Center (DGRC) S2-DRSC cells (stock #181) and ML-DmBG3-c2 cells (DGRC, stock #68). The S2-DRSC cells were grown at 250C to a density of ~5x106 cells/ml in Schneiders *Drosophila* medium (Invitrogen) supplemented with 10% Fetal Bovine Serum (HyClone), 100U/ml of Penicillin G, 100g/ml of Streptomycin sulfate and 292g/ml of L-glutamine. The ML-DmBG3-c2 cells were cultured in the same medium supplemented with 10g/ml of insulin. RNAi was performed as described by Schwartz et al. (2010). The sequences of PCR primers used to produce DNA template for dsRNA synthesis are indicated in the Table S21. Equal loading was achieved based on preliminary SDS-PAGE and coomassie staining of serial dilutions of corresponding nuclear proteins (Figure S4).

**Antibodies**

Recombinant peptides SU(HW) (aa 43-258); ZW5 (aa 5-100); BEAF-32 (aa 88-282); CP190 (aa 606-742) were produced in *E coli* as GST fusions and used for rabbit immunizations. The corresponding antibodies were affinity purified as described (Poux et al., 2001). The mouse monoclonal antibody against BEAF-32 developed by Paul Schedl was obtained from the Developmental Studies Hybridoma Bank developed under the auspices of the NICHD and maintained by The University of Iowa, Department of Biology, Iowa City, IA 52242. Additional information is presented in the Table S22.

**Western blot analysis**

Total nuclear protein was isolated by first lysing cells in hypotonic buffer containing 10% sucrose, 10mM Tris pH8.0, 10mM NaCl, 3mM MgCl2, 2mM DTT and 0.2% Triton X100, followed by 10 min extraction of the nuclear pellet with Sample Buffer (12mM Tris-HCl pH6.8, 5% glycerol, 0.4% SDS, 2.9mM 2-mercaptoethanol, 0.02% bromphenol blue) at 1000C. Serial dilutions of protein samples were loaded on 4-18% SDS polyacrylamide gel, separated by electrophoresis, transferred to a PVDF membrane and detected by incubation with primary antibodies at 1:1000 dilution and secondary antibodies conjugated with alkaline phosphatase at 1:10000 dilution.

**ChIP-chip**

Chromatin preparation, immunoprecipitation and microarray hybridization were done as described in (Kharchenko et al., 2011). Briefly, crosslinked cultured cells were permeabilized with 1% SDS and chromatin was solubilized by shearing with Bioruptor (Diagenode) sonicator. The ChIP products were amplified with Genome Plex Complete WGA Kit (Sigma # WGA2) according to the manufacturer's recommendations with omission of the first chemical DNA fragmentation step. The labeled products were hybridized to Drosophila tiling arrays v2.0 (Affymetrix). The source and amount of antibodies used for ChIP are indicated in the Table S22.

**ChIP-seq**

Half of the ChIP product (see “ChIP-chip”) was used to prepare the sequencing libraries using the Illumina adapters (Genomic Adapter Oligo Mix, Part Number 1000521) according to manufacturer instructions from the ChIP-seq DNA Sample Prep Kit, with reagents from NEB: T4 DNA Plolymerase (M0203L), T4 DNA Ligase Reaction Buffer (B0202S), DNA Polymerase I, Large (Klenow) fragment (M0210L), T4 PNK (M0201L), Klenow fragment (Klenow Fragment (3´→5´ exo–), Quick Ligation Kit (M2200L), and Phusion High-Fidelity PCR Master Mix with HF buffer (F-531S). The libraries were size selected for 200-500 bp. The libraries were subjected to high-throughput sequencing using Illumina GAII platform.

**Expression microarrays**

Total RNA from cultured cells was isolated with TRIZol reagent (Invitrogen) and further purified with RNeasy Kit (Qiagen). 100ng of this RNA was used to prepare labeled RNA probes with GeneChip 3' IVT Express Kit (Affymetrix). The resulted probes were hybridized to GeneChip Drosophila Genome 2.0 Array (Affymetrix) according to manufacturer instructions.

**Data analysis**

**Derivation of genomic binding profiles.** To derive the genomic binding profile for a given protein/condition the log-intensity ratio values (M values) were calculated for all perfect match (PM) probes as log2(ChIP intensity) - log2(input intensity). The M values were then shifted to set the genome-wide mean equal to 0. The smoothed M values were calculated using lowess with a smoothing span corresponding to 500bp. The smoothed intensity ratios shown in the example plots were calculated by taking a trimmed mean over sliding 675bp window, combining normalized data from two replicate experiments.

**Peak calling and class definitions.** The initial peaks were called for individual insulators as local maxima of the smoothed M value profiles, with M value of at least 0.7, separated by at least 2Kb. Positions binding combinations of insulator proteins (binding groups) were identified as sites with peaks for more than one type of insulator, separated by no more than 1Kb. To define stable classes of insulator binding (Fig. 1 of the main manuscript), we selected binding groups in which each member of the group had a value of M within top 60% of the dynamic range for that insulator (*i.e.* Mpeak≥(1-0.6)*T, where T is the median M value of the top 10 peaks observed for a given insulator in a given cell line).

**Characterization of class relationships to annotated genes.** FlyBase v5.5 annotations were used for results shown in Figure 4. Transcriptionally active and silent genes in Figure 4B were separated based on log2(RPKM)=0.5 threshold, using RNA-seq (Cherbas et al., 2011) RPKM estimates.

**Statistical evaluation of RNAi effects on chromosomal binding.** To assess whether there was a significant effect of RNAi on the binding of a given protein, the enrichment values (log2 intensity ratios) of the probes falling within the 1Kbp window around each binding peak were compared using t-test. Probe enrichment values obtained from independent control and RNAi replicates were tested together. The insulator binding position was considered as being significantly affected by RNAi if the resulting Z-score was equal or less than -3.

**Sequence analysis.** To analyze the DNA sequences of insulator proteins binding sites we used ChIP-chip data described in details in the main text as well as higher resolution data produced by ChIP-seq. The two approaches yielded the same results. The discovery of enriched sequence motifs was performed using the MEME Suite (Bailey et al., 2009) for each class of insulator protein binding sites separately. Sequences +/-150 bp around binding peaks were taken as input for this analysis. Search was performed with p-value threshold of 10-4 for the motifs between 7 and 20 bp in length, accounting for complementary sequence. The five top scoring motifs were recorded in each search and then low complexity motifs consisting of mono- and di-nucleotide repeats were filtered out from these sets. The remaining top scoring motifs for each protein were reported. Sequence logos were built using the WebLogo package (Crooks et al., 2004). Distributions of motifs along the genome were computed using the MAST program (Bailey et al., 2009) with position-specific scoring matrixes produced by MEME as input. A distance threshold of 500bp was used to determine association of peaks with motifs.

**Conservation analysis.** The conservation scores were downloaded from UCSC genome browser (Kent et al., 2002) and describe evolutionary conservation in twelve Drosophila species, mosquito, honeybee and red flour beetle, based on a phylogenetic hidden Markov model (phastCons track for *D. melanogaster* genome). Average profiles were generated for the sequences +/-1000 bp around corresponding peaks in each insulator co-binding group. The list of syntenic blocks conserved across 12 Drosophila species was obtained from Bhutkar et al. (2008).

**Expression analysis.** Replicate gene expression data for cells depleted for one of the insulator proteins or mock treated cells were generated by hybridization of corresponding labeled RNA probes to GeneChip Drosophila Genome 2.0 Array (Affymetrix) and processed using MAS 5.0 algorithm as implemented in the bioconductor package Affy (Gautier et al., 2004; www.bioconductor.org). The p-values of gene expression change were calculated based on the data obtained for all the replicates of each sample (t-test). The differentially expressed genes were identified as those with p-values of the change below 0.05, the absolute values of log2 of expression fold-change above 1 and having magnitudes of expression in the top 75% of all tested genes.

**Enhancer blocking assay**

All enhancer blocking assays were performed using *yellow-attB-mobile* reporter vector that contains a full copy of *yellow* gene with FRT sites flanking a polylinker sequence located between wing and body specific enhancers and *yellow* promoter. Additional 5’P-element terminus downstream of *yellow* and *attB* site enables remobilization of a transgene from its original docking site.

To construct *yellow-attB-mobile* the 368 bp SacI-NotI fragment containing *-attB* sequence was excised from pTA-attB plasmid (Groth et al., 2000) and cloned into C4-loxP-y-lox2272 plasmid (Oberstain et. al, 2005) digested with SacI and NotI. The resulting intermediate *CaSpeR-yellow-attB* construct was supplemented with additional 5’P-element terminus, which was PCR-amplified using the following primers 5’ CGATCTGCCGCTGGACTACG 3’ and 5’ CGGCTGCTGCTCTAAACGACG 3’ and cloned into the NotI site. This was followed by the introduction of the FRT flanked polylinker sequence into AorI site of the *yellow* gene. The polylinker sequence corresponds to the PstI-EcoRV fragment of pSL1180 (GE Healthcare).

1kb fragments representing different classes of insulator protein binding sites or control regions were PCR amplified from genomic DNA and cloned into the FRT cassette of *yellow-attB-mobile*. The genomic coordinates (Release Dm3, 2006) of the fragments are indicated below.

random 1: chrX 10748204-10748995;

random2: chr2L 3497892-3498892;

random3: chr2L 14179287-14180287;

random4: chr3L 5232926-5233898;

random5: chr3L 5933930-5934863;

S1: chr3R 13006890-13007890;

S2: chr2R 18327070-18328070;

SCM2: chr3L 8321816-8322816;

SCM3: chr3R:10133401-10134400;

CTCF1: chr2L 19989037-19990037;

CTCF2: chr2L 18347655-18348655;

CTCFC1: chr2R 18021026-18022026;

CTCFC2: chr3L 14664327-14665327;

B1: chr2L 8463984-8464984;

B2: chr3L 7241880-7242880;

BC1: chr2R 20486926-20487926;

BC2: chrX 7827021-7828020;

ZW3: chr3R 20850521-20851520;

ZW4: chr3L 15975461-15976460;

CP1901: chr2R 10028181-10029180;

CP1902: chr3R:27206661-27207660.

To obtain transgenic flies the DNA of reporter constructs was injected into preblastoderm embryos of *y1, M{vas-int.Dm}ZH-2A w*; M{3xP3-RFP.attP}ZH-51D* genotype (Bischof et al., 2007). The emerging adults were crossed with the *y ac w1118* flies and the progeny carrying the transgene in the 51D region were identified by pigmented bristles and (or) wing and body cuticle. The remobilization of the transgenes was achieved by crossing males with flies carrying a source of P-element transposase (Bloomington stock center #4368). The males with mosaic color of cuticle structures were crossed individually with *y ac w1118* and single flies carrying *yellow* but not *RFP* marker were selected from the progeny of the individual crosses and propagated to establish stocks.

The FLP-mediated excision of tested fragments was accomplished by crossing transgenic flies with the strain carrying FLP recombinase (*w1118*; *S2 CyO hsFLP ISA/Sco*; +). The expression of FLP was induced by the exposure of third instar larvae to 37C heat shock for 2 hours.

The *yellow* phenotypes of transgenic flies were evaluated by scoring the pigmentation of the wing blades, body cuticle in the abdominal stripes and bristles in 3- to 4-day-old females by using a five-grade pigmentation scale. In this scale the phenotype of *y[2]* allele would score as 1.5/1.5/5 ; *y[82f29]* allele as 1/1/5 and *y[1]* as 1/1/1.

**Supplementary results**

**Additional details on genomic mapping of insulator proteins in S2-DRSC and ML-DmBG3-c2 cells**

The mapping of each protein was initially done in the chromatin of S2 cells. Two different independently raised antibodies were used to map SU(HW), dCTCF, BEAF32, MOD(MDG4)67.2 and CP190. In case of SU(HW), dCTCF, BEAF32 and CP190 the two antibodies gave very similar results with all strong binding sites detected by both antibodies (Figure S12). The mapping of MOD(MDG4)67.2 isoform was validated by ChIP-chip with the antibodies directed against the common part of MOD(MDG4). The majority of the sites detected with MOD(MDG4)67.2 specific antibody were also detected with pan-MOD(MDG4) antibody. The identity of the additional sites specific to pan-MOD(MDG4) antibody cannot be independently confirmed at this time therefore we did not investigate their properties any further. Our confidence in the quality of the MOD(MDG4)67.2 mapping is reinforced by the strict coincidence of the detected sites with the binding of SU(HW) and CP190. To map ZW5 distribution we have generated a specific rabbit polyclonal antibody that immunoprecipitates a set of distinct chromatin regions which includes *scs*, the known ZW5 binding site. Unfortunately the only other anti-ZW5 antibody available (mouse monoclonal generated by Blanton et al. (2003)) is extremely weak and does not work for ChIP in our hands. RNAi against ZW5 proved very inefficient despite multiple treatments and the use of several different dsRNA fragments. The quality of our ZW5 mapping is in part corroborated by the analysis of the DNA sequences underneath the strong ZW5 peaks (Figure S11). This analysis reveals a distinct motif with a perfect match to the sequence of ZW5 binding site in the *scs* insulator element defined by the DNase I footprinting (Gazsner et al., 1999). At this point we consider the strong ZW5 binding sites that contain one or more ZW5 sequence motifs as high confidence and the rest as low confidence binding sites.

**DNA sequence features of standalone CP190 sites**

CP190 has three zinc finger domains and, although originally reported to bind DNA directly (Pai et al., 2004), it was later proposed to be recruited by SU(HW), dCTCF and BEAF32 and to serve as a mediator of trans-interactions between different insulator elements (Bushey et al., 2009). To search for motifs potentially recognized by CP190, we analyzed the sequences underneath standalone CP190 sites. We found two distinct motifs, consistent with binding of CP190 to DNA either directly or through an unknown DNA-binding protein(s) (Figure S1). Both motifs are degenerate, suggesting that the sequence specificity of CP190 or its potential DNA-binding partners is poor.

**Rapid evolution of insulator binding regions**

The functional importance of regulatory elements is often reflected in higher evolutionary conservation of their DNA sequences. We therefore hoped that high conservation would separate functional insulator elements from the bulk of insulator protein binding sites. To our surprise the DNA sequences of fragments BC1 and CP1901, which are the best enhancer blockers in the transgenic test, are not conserved (Figures S6A, Figure S7). Systematic comparison of the sequences from different classes of insulator protein binding sites indicates that this is a general feature. The classes with the best insulation potential tend to evolve rapidly (Figure S6B). Thus the CTCF-CP190 and the standalone CP190 sites are much less conserved than the average over the genome. In contrast, the conservation of standalone SU(HW) and CTCF sites is no different from the average. The evolutionary plasticity of CTCF-CP190 and standalone CP190 sites cannot be ascribed to their bias towards TSSs, as the latter display a very different conservation pattern (Figure S6B). It appears that the insulator elements differ from conventional regulatory elements of enhancer/ repressor type by their high evolutionary plasticity. It is tempting to speculate that there may be other classes of regulatory elements distinguished by unusually low rather than high conservation rate.

**Supplementary references**

Bailey TL, Boden M, Buske FA, Frith M, Grant CE, Clementi L, Ren J, Li WW, Noble WS. MEME SUITE: tools for motif discovery and searching. Nucleic Acids Res. 2009. 37:W202-208.

Bhutkar A, Schaeffer SW, Russo SM, Xu M, Smith TF, Gelbart WM. Chromosomal rearrangement inferred from comparisons of 12 Drosophila genomes. Genetics. 2008 179:1657-1680.

Blanton J, Gaszner M, Schedl P. Protein:protein interactions and the pairing of boundary elements in vivo. Genes Dev. 2003. 17:664-675.

Cherbas L, Willingham A, Zhang D, Yang L, Zou Y, Eads BD, Carlson JW, Landolin JM, Kapranov P, Dumais J, et al. The transcriptional diversity of 25 Drosophila cell lines. Genome Res. 2011. 21:301-314.

Crooks GE, Hon G, Chandonia JM, Brenner SE. WebLogo: a sequence logo generator. Genome Res. 2004 14:1188-1190.

Gaszner M, Vazquez J, Schedl P. The Zw5 protein, a component of the scs chromatin domain boundary, is able to block enhancer-promoter interaction. Genes Dev. 1999. 13:2098-2107.

Gautier L, Cope L, Bolstad BM, Irizarry RA. affy--analysis of Affymetrix GeneChip data at the probe level. Bioinformatics. 2004. 20:307-315.

Groth AC, Olivares EC, Thyagarajan B, Calos MP. A phage integrase directs efficient site-specific integration in human cells. Proc Natl Acad Sci U S A. 2000. 97:5995-6000.

Kent WJ, Sugnet CW, Furey TS, Roskin KM, Pringle TH, Zahler AM, Haussler D. The human genome browser at UCSC. Genome Res. 2002 12:996-1006.

Oberstein A, Pare A, Kaplan L, Small S. Site-specific transgenesis by Cre-mediated recombination in Drosophila. Nat Methods. 2005. 2:583-585.

Poux S, McCabe D, Pirrotta V. Recruitment of components of Polycomb Group chromatin complexes in Drosophila. Development. 2001. 128:75-85.

**Supplementary figure legends**

**Figure S1. DNA motifs characteristic of *gypsy*-like, CTCF+CP190 (class 9) and CP190 standalone binding sites.** The motifs enriched around the centers of 1kb sequences from corresponding classes of insulator protein binding sites are shown.

**Figure S2. The effect of RNAi knock-down on binding of insulator proteins to various classes of binding sites.** The sites at which ChIP-chip signal was consistently reduced judged from the comparison of two replicate mock RNAi experiments and two specific RNAi experiments (z-scores < -3, unpaired t-test) were counted and their fractions plotted. The error bars indicate the 95% confidence interval. Note that the effects of BEAF-32 knock down on CTCF or SU(HW) and vice versa were not assayed. All other combinations are shown. In some cases the knock-downs had zero effect on the binding of an assayed protein (within indicated error margins).

**Figure S3. The differences in the quality of binding sites between class 3 (*gypsy*-like) and class 2 (standalone SU(HW)) sites.** The regions of 1kb centered on the insulator protein binding sites of the indicated class were examined for all matches to the SU(HW) motif Position Weight Matrix with the –log10(p-value) scores greater than 4. The box-plots show the distribution of motif scores. The median values are indicated by thick horizontal lines and the notches correspond to 95% confidence intervals. The whiskers indicate the extreme data points within 1.5 times the interquartile range from the box with the outliers marked as circles.

**Figure S4. Loading controls for western blots on Figure 3A.** To control for differences in protein concentrations serial dilutions of nuclear extracts from cells subjected to RNAi against SU(HW) (**A**), CTCF (**B**), CP190 (**C**) and BEAF-32 (**D**) were separated with SDS-PAGE alongside with corresponding serial dilutions of nuclear extracts from control mock treated cells. The images of the dried coomassie stained gels are shown.

**Figure S5. Enhancer-blocking assay phenotypes.** **A** – recipient *yellow* minus strain, **B** – transgenic negative control (*random 1*) strain, **C** – transgenic positive control (*SuHw680 SmaI-ClaI*) strain, **D** – transgenic (BC1) strain. Note the dark color of the wing blades, abdomen and bristles in **B** as compared to **A** and light color of wing blades and abdomen but dark bristles in **C-D**.

**Figure S6. Evolutionary plasticity of chromatin insulators.** **A.** The comparison of CP190 ChIP-chip signal (green line) and PhastCons conservation probability scores (red bars; 0 = non-conserved, 1 = highly conserved) in the region around CP1901 insulator fragment (vertical dashed line) shows that it is not conserved. **B.** For each class of insulator protein binding sites and 500 randomly chosen TSS the conservation probability scores were plotted as mean values for all sequences within a class or as heat maps for individual sequences. The prominent dip in the average conservation scores at CTCF+CP190 and standalone CP190 sites indicates their unusual evolutionary plasticity. The low conservation of insulator sequences is not due to their bias towards the break points of synteny blocks (Figure S8).

**Figure S7. The sequence of BC1 insulator element is not conserved.** The comparison of CP190 (green line) and BEAF-32 (blue line) ChIP-chip signals with PhastCons conservation probability scores (red bars; 0 = non-conserved; 1 = highly conserved) in the region around BC1 insulator fragment shows that it is not conserved. The center of the BC1 fragment is indicated with vertical dashed line.

**Figure S8. The classes of insulator protein binding sites with high enhancer blocking potential are not biased towards the break points of synteny blocks.** The dashed red line indicates the value expected by chance and the whiskers mark 95% confidence interval. The lack of significant differences between CP190 and SU(HW) or CTCF standalone sites indicates that the low sequence conservation of the CP190 standalone sites is due to their unusual evolutionary plasticity.

**Figure S9. Partial loss of CTCF after RNAi leads to the spreading of H3K27me3.** The right borders of H3K27me3 domains in *disco-r* – *disco* (**A**) and *Gsc* – *ds* (**B**) Polycomb target regions coincide with CTCF binding sites. Even partial loss of CTCF from these sites after CTCF RNAi leads to the spreading of histone H3 K27 tri-methylation. Note that in case of H3K27me3 spreading in *disco-r* – *disco* region (**A**) the associated reduction of CTCF binding is not even statistically significant (z-score = -1.4).

**Figure S10. Detection of gene expression changes disregarding the replicate consistency.** As in Figure 5A, the average fold change between the two specific and two mock RNAi experiments (y-axes) was plotted against the highest average expression value detected in the mock or specific RNAi samples (x-axes). Each graph point represents one transcript interrogated by the microarray. Transcripts robustly expressed before or after specific RNAi treatment are to the right of vertical dashed lines. All transcripts showing average 2-fold or greater change after specific RNAi treatment are circled.

**Figure S11. ZW5 recognition motif.** **A.** The ZW5 recognition motif defined from sequence analysis of strong binding sites. **B**. The above motif is enriched within 250bp from the centers of strong ZW5 binding sites. **C**. The DNA sequence of ZW5 binding site within *scs* insulator element defined by *in vitro* Dnase I footprinting (Gazsner et al., 1999). The nucleotides indicated in low case are protected on one of the strands; the nucleotides indicated in upper case are protected on both strands. Note that nucleotides at all conserved positions of the recognition motif in **A** match the experimentally defined binding site within *scs* element (indicated in red).

**Figure S12. The agreement of binding sites detection by two independently derived antibodies.** For each insulator protein binding site detected with one of the corresponding antibodies the presence of the site within 1kb distance detected with the second antibody was taken as confirmed detection. Only sites characterized by log2 IP/UNPUT (M-values) equal or exceeding 0.5 were considered in the analysis. As a rule the stronger peaks are more robustly detected with most data sets showing 97% agreement from M>1. The higher threshold for BEAF-32 (M>2.5) is due to lower strength of corresponding monoclonal antibody. Only peaks confirmed by the two antibodies were used for downstream analysis.
