# Supplementary material for: Nature and function of insulator protein binding sites in the Drosophila genome
Source: HighWire-hosted journal article supplement (doi:10.1101/gr.138156.112), 2012-07-05
Supplement: Schwartz_Table_S19.docx [file Schwartz_Table_S19.docx]

**Table S19. Expression of *yellow* reporter gene at different chromosomal locations**

| Fragment class | Construct name | Pigmentation at different locations | | | | | | | | | | | | | mean | t-test p-value <0.05 | wilcoxon p-value <0.05 |
| --- | --- | --- | --- | --- | --- | --- | --- | --- | --- | --- | --- | --- | --- | --- | --- | --- | --- |
| Negative control | random1 | 5/5/5 | 5/5/5 | 3/3/5 | 5/5/5 | 5/5/5 | 5/5/5 | 4/4/5 | 5/5/5 | 5/5/5 | 5/5/5 | 5/5/5 |  |  | 4.7/4.7/5.0 |  |  |
| Negative control | random2 | 5/4/5 | 5/4/5 | 4/3/5 | 4/3/5 | 5/4/5 | 5/4/5 | 4/3/5 | 5/4/5 | 5/5/5 |  |  |  |  | 4.7/3.8/5.0 |  |  |
| Negative control | random3 | 4/3/5 | 4/2/5 | 4/3/5 | 4/4/5 | 3/2/5 | 5/4/5 | 4/3/5 | 4/3/5 | 4/4/5 |  |  |  |  | 4.0/3.1/5.0 |  |  |
| Negative control | random4 | 4/3/5 | 4/3/5 | 3/3/5 | 5/3/5 | 3/2/5 | 5/5/5 | 4/4/5 | 4/3/5 | 4/3/5 | 4/3/5 |  |  |  | 4.0/3.2/5.0 |  |  |
| Negative control | random5 | 5/4/5 | 5/3/5 | 5/3/5 | 4/3/5 | 4/3/5 | 5/4/5 | 4/3/5 | 5/4/5 |  |  |  |  |  | 4.6/3.4/5.0 |  |  |
| 2§ | S1 | 2/2/2 | 3/4/2 | 3/2/1 | 5/4/5 | 3/2/3 | 3/3/4 | 3/2/4 | 2/2/5 | 5/4/5 | 4/3/2 | 5/4/5 | 3/2/1 | 3/2/2 | 3.4/2.8/3.2 | +/+/+ | +/+/+ |
| 2§ | S2 | 5/4/5 | 3/1/1 | 4/3/2 | 3/2/1 | 4/3/5 | 3/2/5 | 5/4/5 | 4/4/3 | 5/4/5 | 3/3/2 |  |  |  | 3.9/3.0/3.4 | -/+/+ | +/-/+ |
| 3 | SCM2 | 4/4/5 | 5/5/5 | 3/2/5 | 3/3/5 | 3/3/5 | 2/2/5 | 5/4/5 | 3/2/5 | 3/3/5 |  |  |  |  | 3.4/3.1/5.0 | +/-/- | +/-/- |
| 3 | SCM3 | 4/4/5 | 4/3/5 | 5/5/5 | 4/4/5 | 3/2/5 | 4/3/5 | 3/3/5 | 4/3/5 | 5/5/5 | 5/4/5 |  |  |  | 4.1/3.6/5.0 | -/-/- | -/-/- |
| 4 | CTCF1 | 5/4/5 | 5/4/5 | 5/5/5 | 4/3/5 | 4/3/5 | 3/3/5 | 4/3/5 | 4/3/5 | 4/3/5 | 5/4/5 | 5/4/5 | 4/4/5 |  | 4.3/3.6/5.0 | -/-/- | -/-/- |
| 4 | CTCF2 | 5/4/5 | 4/3/5 | 4/4/5 | 3/2/5 | 5/4/5 | 5/4/5 | 4/4/5 | 5/4/5 | 3/3/5 | 4/4/5 | 5/4/5 |  |  | 4.3/3.6/5.0 | -/-/- | -/-/- |
| 9++ | CTCFC1 | 3/3/5 | 3/3/5 | 3/3/5 | 4/3/5 | 4/4/5 | 3/2/5 | 4/2/5 | 3/3/5 | 4/3/5 | 3/3/5 |  |  |  | 3.4/2.9/5.0 | +/+/- | +/+/- |
| 9 | CTCFC2 | 4/4/5 | 4/5/5 | 5/3/5 | 4/3/5 | 3/4/5 | 5/5/5 | 4/4/5 | 4/3/5 | 4/5/5 | 4/4/5 | 4/5/5 |  |  | 4.1/4.1/5.0 | -/-/- | -/-/- |
| 7++ | B1 | 4/4/5 | 4/4/5 | 4/4/5 | 3/2/5 | 4/4/5 | 3/3/5 | 3/2/5 | 2/2/5 | 3/3/5 | 4/3/5 | 3/3/5 | 3/2/5 |  | 3.3/3.0/5.0 | +/+/- | +/+/- |
| 7 | B2 | 4/4/5 | 2/2/5 | 4/4/5 | 3/3/5 | 4/4/5 | 4/3/5 | 5/4/5 | 3/3/5 | 4/3/5 | 3/3/5 |  |  |  | 3.6/3.3/5.0 | +/-/- | +/-/- |
| 5+++ | BC1 | 1/1/5 | 2/1/5 | 2/2/5 | 3/2/5 | 3/2/5 | 2/2/5 | 1/2/5 | 2/2/5 |  |  |  |  |  | 2.0/1.8/5.0 | +/+/- | +/+/- |
| 5+ | BC2 | 2/2/5 | 3/3/5 | 4/4/5 | 1/1/5 | 3/3/5 | 4/4/5 | 3/2/5 | 3/3/5 | 5/5/5 |  |  |  |  | 3.1/3.0/5.0 | +/-/- | +/-/- |
| 1 | ZW3 | 4/3/5 | 4/3/5 | 3/2/5 | 5/4/5 | 4/2/5 | 4/3/5 | 5/3/5 | 4/3/5 | 5/4/5 |  |  |  |  | 4.2/3.0/5.0 | -/+/- | -/+/- |
| 1 | ZW4 | 5/5/5 | 5/5/5 | 5/4/5 | 4/3/5 | 4/3/5 | 4/4/5 | 5/5/5 | 4/3/5 | 3/3/5 | 5/4/5 | 5/4/5 | 4/4/5 |  | 4.4/3.9/5.0 | -/-/- | -/-/- |
| 6+++ | CP1901 | 2/2/5 | 2/1/5 | 1/1/5 | 2/1/5 | 3/2/5 | 2/2/5 | 1/1/5 |  |  |  |  |  |  | 1.9/1.4/5.0 | +/+/- | +/+/- |
| 6++ | CP1902 | 5/4/5 | 5/4/5 | 4/3/5 | 3/2/5 | 3/3/5 | 3/2/5 | 3/2/5 | 3/2/5 | 3/4/5 |  |  |  |  | 3.6/2.9/5.0 | +/+/- | +/+/- |
| Positive control | SuHw680 SmaI-ClaI |  |  |  |  |  |  |  |  |  |  |  |  |  |  |  |  |
