# Supplementary material for: Nature and function of insulator protein binding sites in the Drosophila genome
Source: HighWire-hosted journal article supplement (doi:10.1101/gr.138156.112), 2012-07-05
Supplement: Schwartz_Table_S20.docx [file Schwartz_Table_S20.docx]

**Table S20. The repression of *yellow* by standalone SU(HW) sites is reversed upon fragments excision**

| Line | Pigmentation before FLP recombination | Pigmentation after FLP recombination |
| --- | --- | --- |
| S1-3 | 3/2/1 | 5/4/5 |
| S1-10 | 4/3/2 | 5/4/5 |
| S2-3 | 4/3/2 | 5/4/5 |
| S2-4 | 3/2/1 | 4/4/5 |
| S2-10 | 3/3/2 | 5/4/5 |
