# Supplementary material for: Nature and function of insulator protein binding sites in the Drosophila genome
Source: HighWire-hosted journal article supplement (doi:10.1101/gr.138156.112), 2012-07-05
Supplement: Schwartz_Table_S21.xlsx [file Schwartz_Table_S21.xlsx]

## Sheet: Blad1
Table S21. List of PCR primers to prepare template for dsRNA synthesis
RNAi	Pimer name	Primer sequence 5'->3'
SU(HW)	SuHw-RNAi-F	CTAATACGACTCACTATAGGGAGGAGGTTGTACCAGTGGCGTT
	SuHw-RNAi-R	CTAATACGACTCACTATAGGGAGCAATCCACCTTCGTCCTGAT
CTCF	CTCF-RNAi_F	CTAATACGACTCACTATAGGGAGAACGAGGCTGAGGTCTACGA
	CTCF-RNAi-R	CTAATACGACTCACTATAGGGAGTAAATCGCGACTTGCAGATG
CP190	CP190-RNAi-F	CTAATACGACTCACTATAGGGAGATCCACCAGCAAATACAGCC
	CP190-RNAi-r	CTAATACGACTCACTATAGGGAGTCATATTCCTCTTCGGTGCC
BEAF-32	Beaf-kd1	CTAATACGACTCACTATAGGGAGCAAGGCCAAGACGCTGAG
	Beaf-kd2	CTAATACGACTCACTATAGGGAGCGCTGATTTGCCCATTTAC
Note the common T7 promoter sequence at 5' ends of all primers.
