# Supplementary material for: Nature and function of insulator protein binding sites in the Drosophila genome
Source: HighWire-hosted journal article supplement (doi:10.1101/gr.138156.112), 2012-07-05
Supplement: Schwartz_Table_S22.xlsx [file Schwartz_Table_S22.xlsx]

## Sheet: Blad1
Table S22. The list of antibodies
Antibody name	Antigen	Description	Affinuty purification	Amount per ChIP	Source
SU(HW)-HB	SU(HW)	rabbit polyclonal	yes	14ug	This study
SU(HW)-VC	SU(HW)	rabbit polyclonal	no	10ul	Spana et al., 1988
CP190-HB	CP190	rabbit polyclonal	yes	60ug	This study
CP190-VC	CP190	rabbit polyclonal	no	10ul	Pai et al., 2004
CTCF	CTCF	rabbit polyclonal	no	5ul	Moon et al., 2005
CTCF-VC	CTCF	guinea pig	no	5ul	Gerasimova et al., 2007
mod2.2-VC	MOD(MDG4)67.2	rat monoclonal	no	5ul	Mongelard et al., 2002
mod(MDG4)-all	all MOD(MDG4) isoforms	rabbit polyclonal	no	20ul	Buchner et al., 2000
BEAF-HB	BEAF-32	rabbit polyclonal	yes	7.5ug	This study
BEAF70	BEAF-32	mouse monoclonal	no	7.5ug	Blanton et al., 2003., distributed by Developmental Studies Hybridoma Bank, Iowa University
ZW5	ZW5	rabbit polyclonal	yes		This study
H3K27me3	H3K27me3	mouse monoclonal	yes	6ug	AbCam; #6002
H3K4me3	H3K4me3	rabbit polyclonal	yes	5ug	AbCam; #8580
