# Supplementary material for: Nature and function of insulator protein binding sites in the Drosophila genome
Source: HighWire-hosted journal article supplement (doi:10.1101/gr.138156.112), 2012-07-05
Supplement: Schwartz_Table_S23.xlsx [file Schwartz_Table_S23.xlsx]

## Sheet: Blad1
Table S23. The list of ChIP-chip experiments and their database identifiers
Protein	Cell line	RNAi	modMINE experiment identifier	GEO accession
BEAF-32	BG3	mock	modENCODE_3665	GSE32775
BEAF-32	BG3	BEAF-32	modENCODE_3663	GSE32773
BEAF-32	BG3	CP190	modENCODE_3664	GSE32774
BEAF-32	BG3	untreated	modENCODE_921	GSE20811
BEAF-32	S2	untreated	modENCODE_922	GSE20812
BEAF-32	S2	untreated	modENCODE_274	GSE20760
CP190	BG3	CP190	modENCODE_3747	GSE32816
CP190	BG3	CTCF	modENCODE_3667	GSE32777
CP190	BG3	SU(HW)	modENCODE_3670	GSE32780
CP190	BG3	BEAF-32	modENCODE_3666	GSE32776
CP190	BG3	mock	modENCODE_3668	GSE32778
CP190	S2	untreated	modENCODE_925	GSE20815
CP190	S2	untreated	modENCODE_280	GSE20766
CP190	BG3	untreated	modENCODE_924	GSE20814
CTCF	BG3	CP190	modENCODE_3671	GSE32781
CTCF	BG3	mock	modENCODE_3673	GSE32783
CTCF	BG3	CTCF	modENCODE_3672	GSE32782
CTCF	BG3	untreated	modENCODE_282	GSE20767
CTCF	BG3	untreated	modENCODE_3280	GSE32749
CTCF	S2	untreated	modENCODE_283	GSE20768
CTCF	S2	untreated	modENCODE_3281	GSE32750
MOD(MDG4)67.2	BG3	untreated	modENCODE_324	GSE20802
MOD(MDG4)67.2	S2	untreated	modENCODE_2674	GSE23489
SU(HW)	BG3	CP190	modENCODE_3714	GSE32808
SU(HW)	BG3	SU(HW)	modENCODE_3718	GSE32812
SU(HW)	BG3	mock	modENCODE_3719	GSE32813
SU(HW)	BG3	mock	modENCODE_3716	GSE32810
SU(HW)	S2	untreated	modENCODE_330	GSE20808
SU(HW)	BG3	untreated	modENCODE_951	GSE20833
SU(HW)	S2	untreated	modENCODE_331	GSE20809
ZW5	S2	untreated	modENCODE_3804	GSE32853
ZW5	BG3	untreated	modENCODE_3064	GSE25373
H3K27me3	BG3	mock	modENCODE_3682	GSE32791
H3K27me3	BG3	BEAF-32	modENCODE_3679	GSE32788
H3K27me3	BG3	CP190	modENCODE_3680	GSE32789
H3K27me3	BG3	CTCF	modENCODE_3681	GSE32790
H3K27me3	BG3	SU(HW)	modENCODE_3683	GSE32792
