# Supplementary figures and images for: Nature and function of insulator protein binding sites in the Drosophila genome
Source: HighWire-hosted journal article supplement (doi:10.1101/gr.138156.112), 2012-07-05

**peak agreement in S2 cells**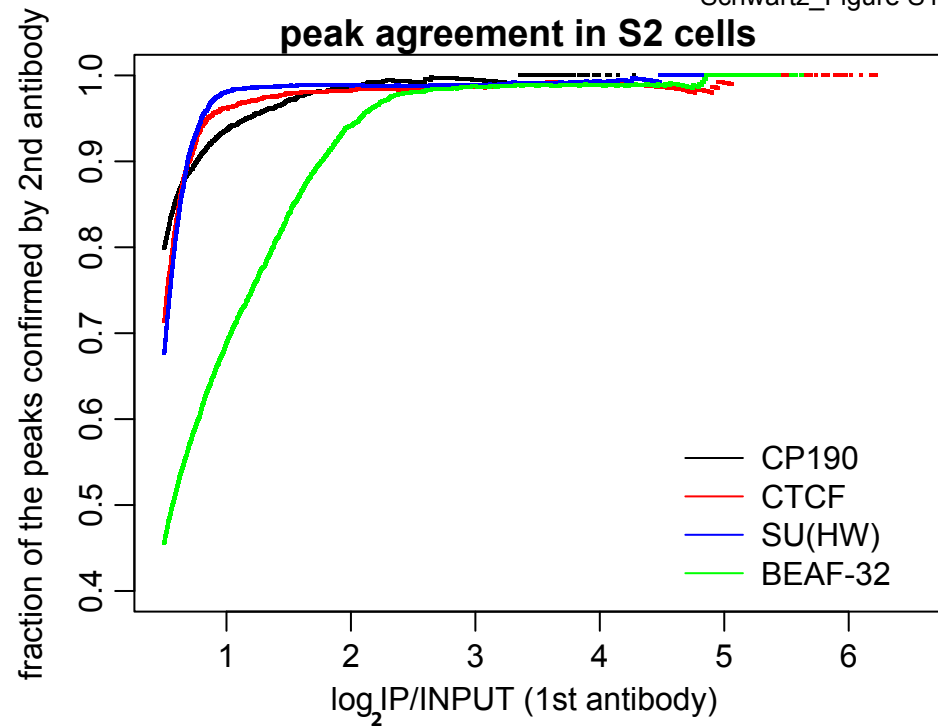

Supplement: Schwartz138156_Figure_S12.pdf [file Schwartz138156_Figure_S12.pdf]

**A**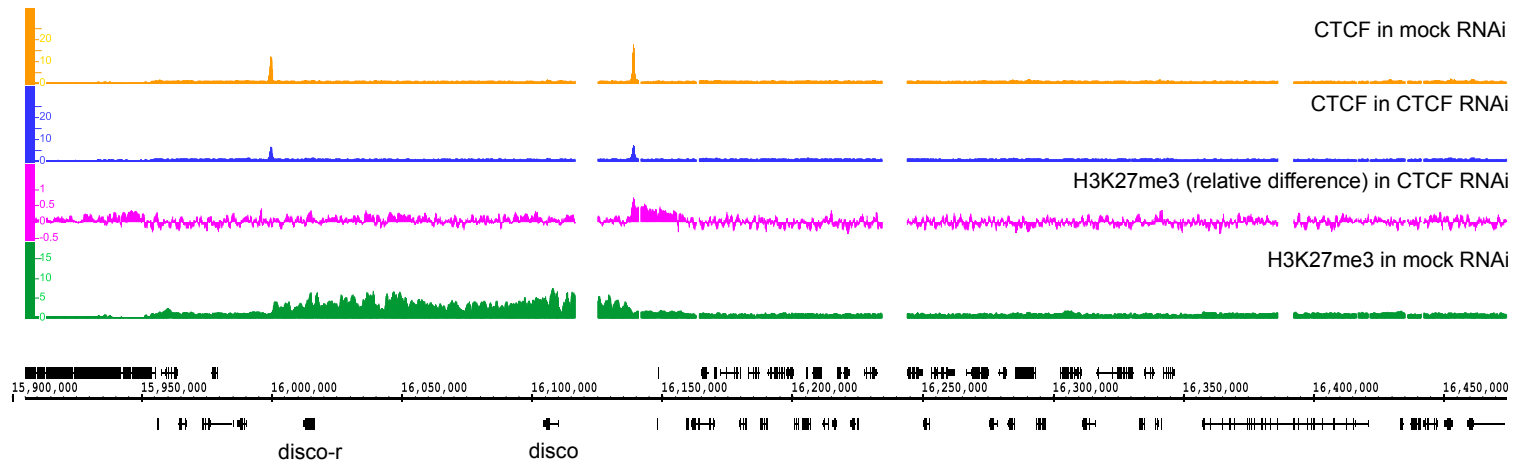**B**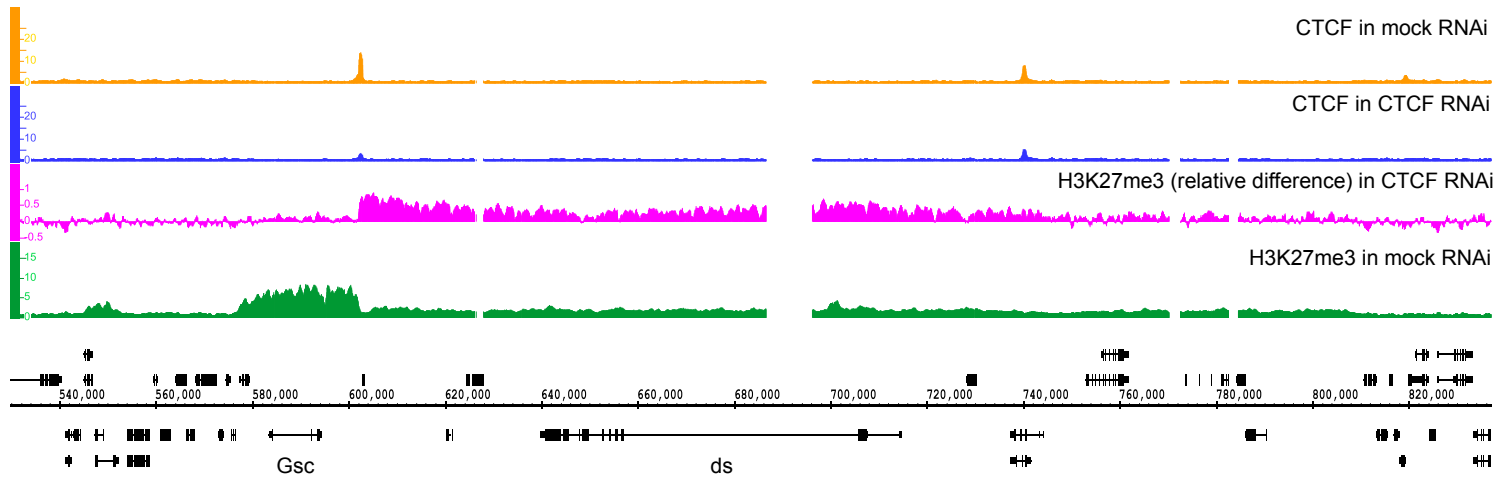

Supplement: Schwartz138156_Figure_S9.pdf [file Schwartz138156_Figure_S9.pdf]
